# Supplementary material for: An optimized IFN-γ ELISpot assay for the sensitive and standardized monitoring of CMV protein-reactive effector cells of cell-mediated immunity
Source: PubMed Central journal article supplement (PMC5339961; doi:10.1186/s12865-017-0195-y), 2017-03-07
Supplement: 12865_2017_195_MOESM2_ESM.pdf [file 12865_2017_195_MOESM2_ESM.pdf]

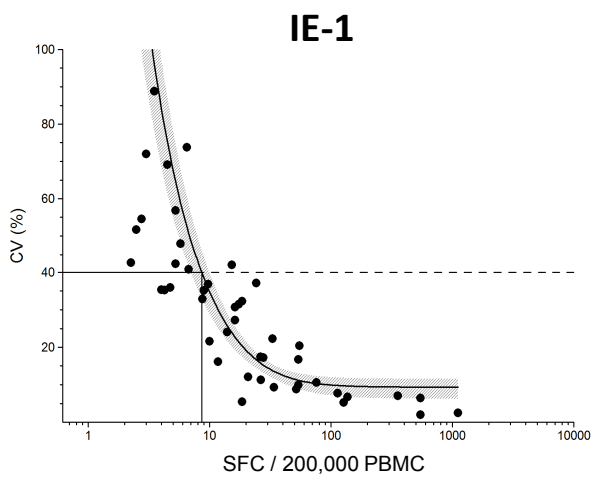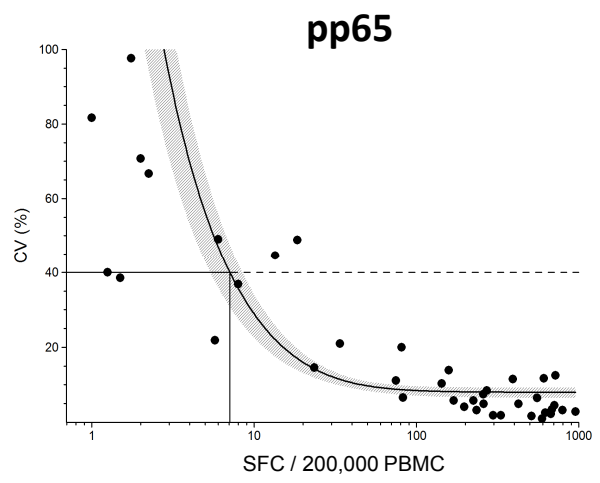

Additional File 2 (Barabas et al.)
