# Supplementary material for: An optimized IFN-γ ELISpot assay for the sensitive and standardized monitoring of CMV protein-reactive effector cells of cell-mediated immunity
Source: PubMed Central journal article supplement (PMC5339961; doi:10.1186/s12865-017-0195-y), 2017-03-07

**A** d290

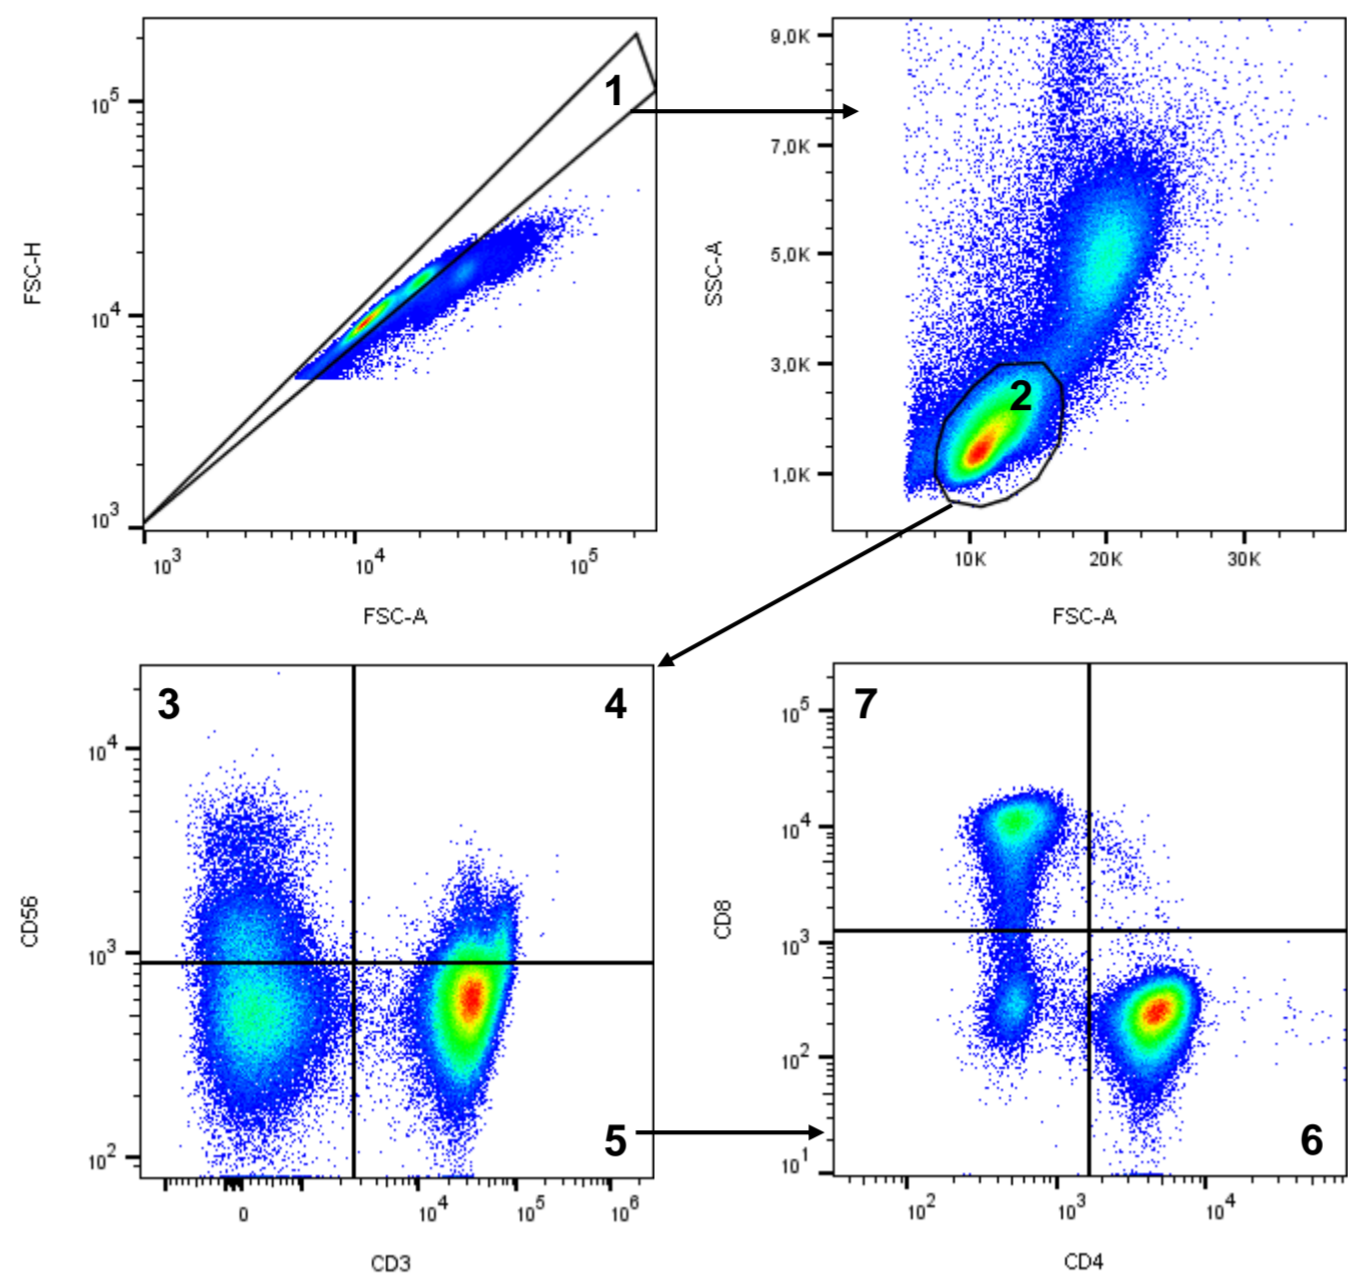

**B** d290

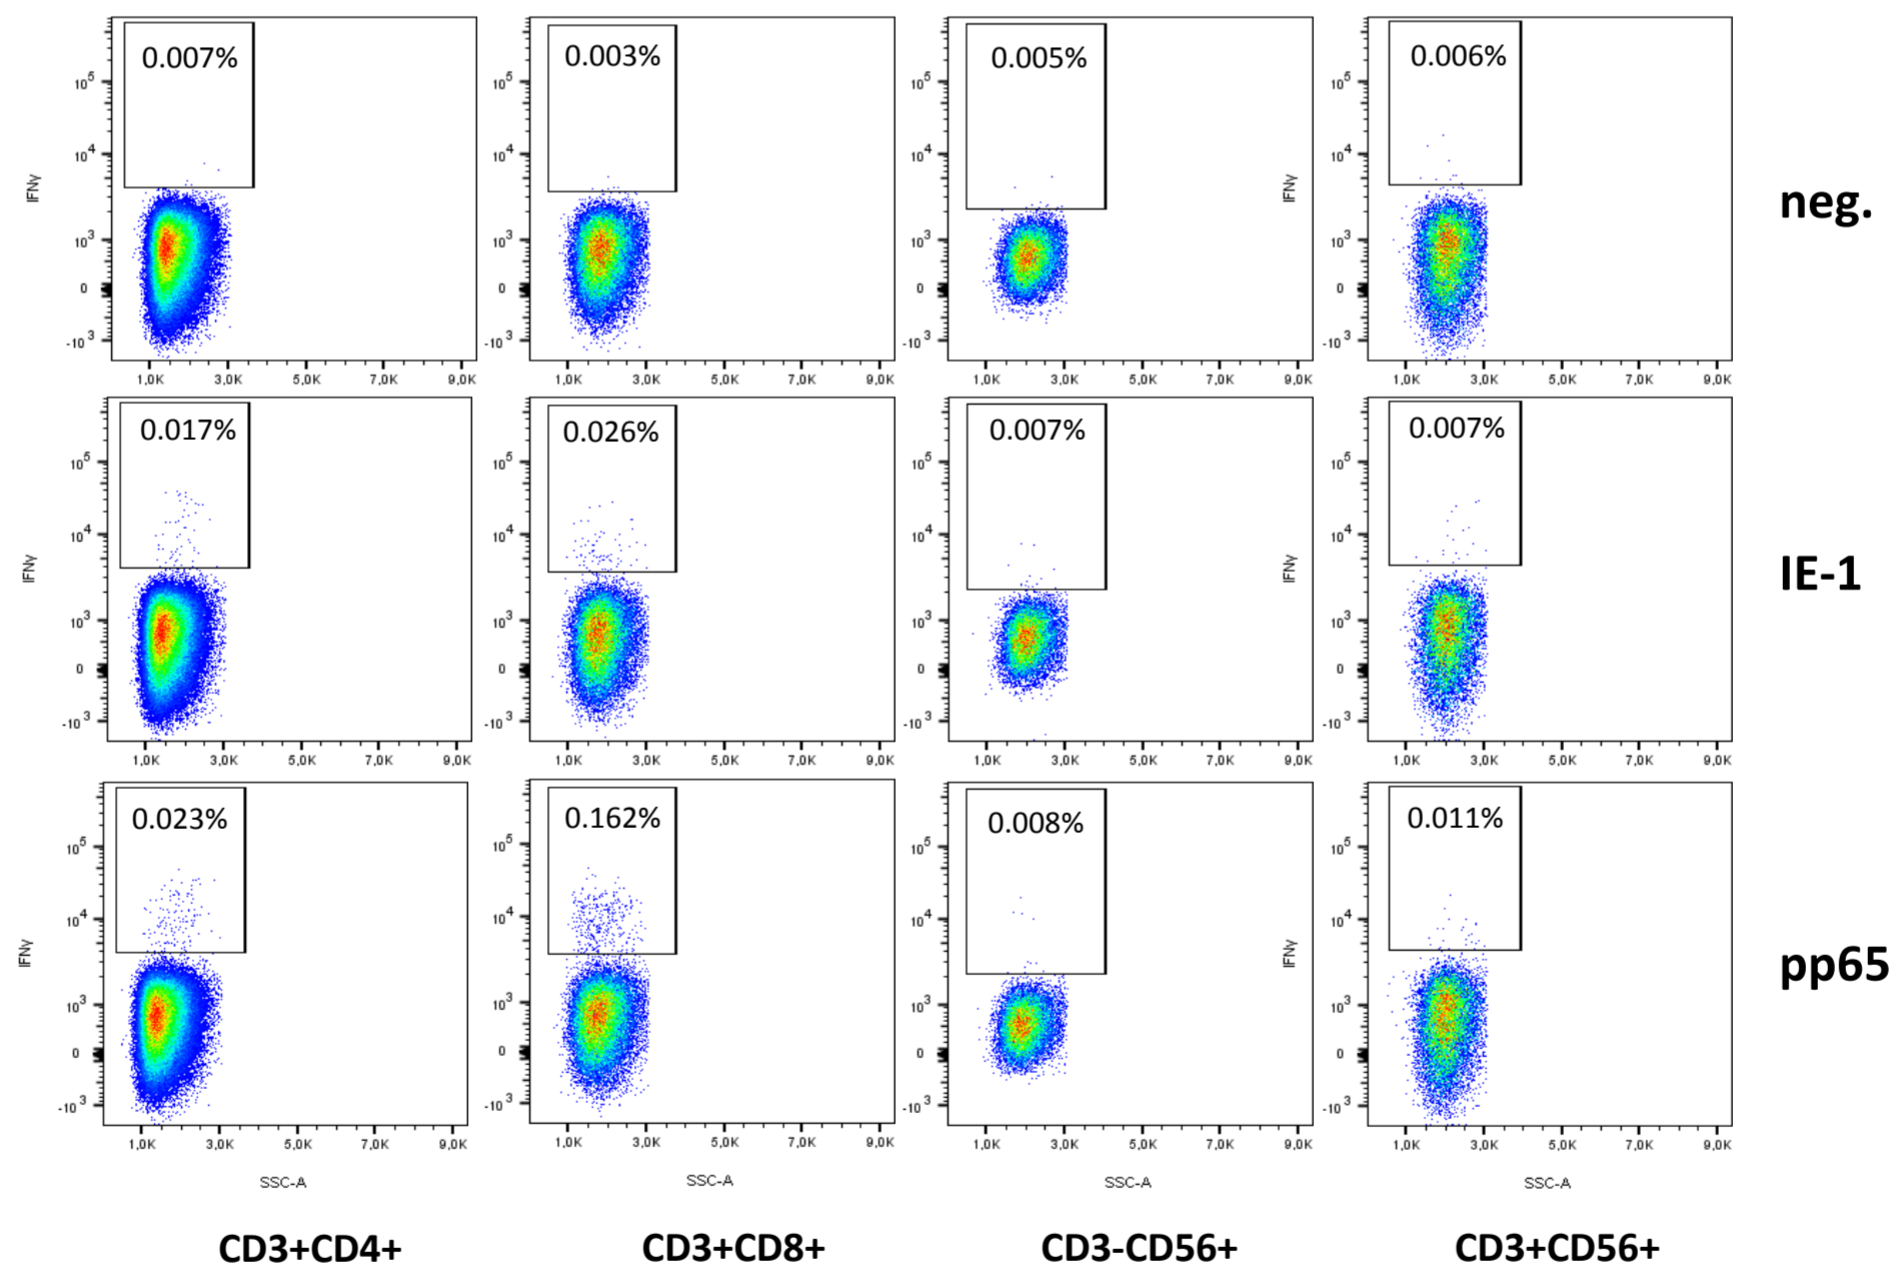

Supplement: 12865_2017_195_MOESM3_ESM.pdf [file 12865_2017_195_MOESM3_ESM.pdf]
